# Supplementary material for: The transcription factor ERG regulates a low shear stress-induced anti-thrombotic pathway in the microvasculature
Source: Springer Nature journal article supplement (doi:10.1038/s41467-019-12897-w), 2019-11-01
Supplement: MOESM1 [file 41467_2019_12897_MOESM1_ESM.pdf]

## **Supplementary Information**

The transcription factor ERG regulates a low shear stress-induced anti-thrombotic pathway in the microvasculature

Peghaire et al.

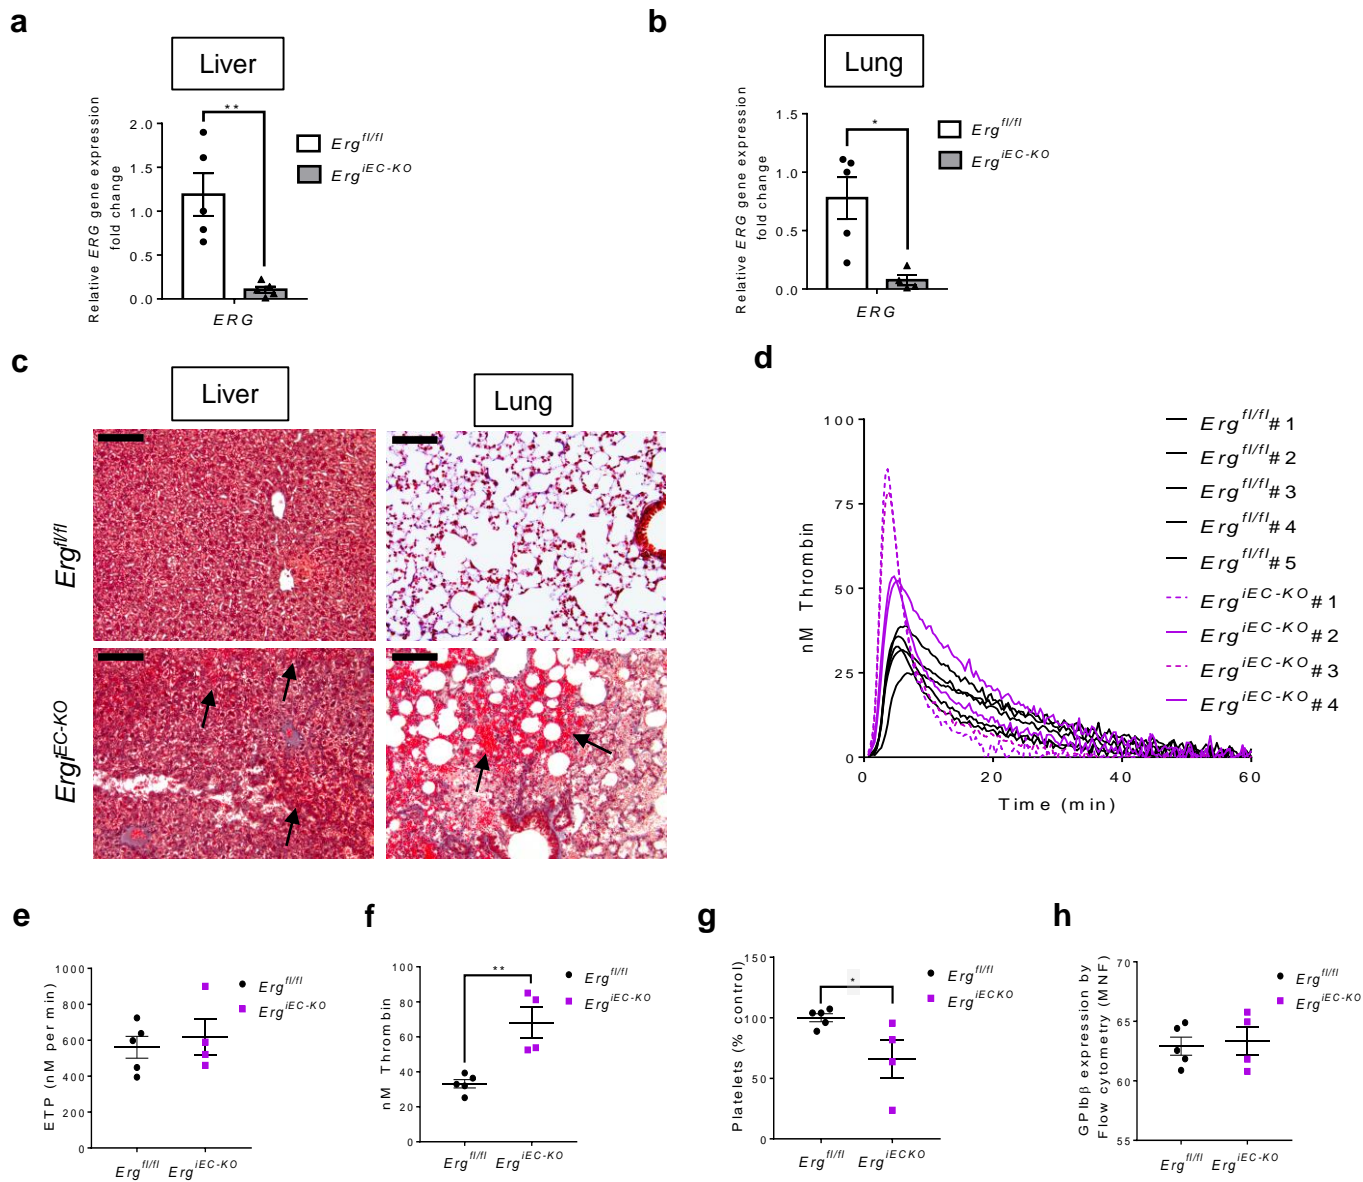

**Supplementary Figure 1: Deletion of ERG in vivo is associated with impairment of coagulation and bleeding.** (a-b) qPCR analysis of *ERG* gene expression in whole liver (a) and lung (b) lysates from adult control (*Erg<sup>fl/fl</sup>*) and ERG-deficient (*Erg<sup>iEC-KO</sup>*) mice (n=5 per genotype). Data were normalized to 18S. (c) Representative image of Masson's Trichrome staining performed on liver and lung sections from *Erg<sup>fl/fl</sup>* and *Erg<sup>iEC-KO</sup>* mice, 45 days after tamoxifen injection, and showing the presence of extravasated red blood cells (black arrows). Scale bar 100  $\mu$ m. (d-f) Thrombin generation using CAT assay was performed on plasma from *Erg<sup>iEC-KO</sup>* and *Erg<sup>fl/fl</sup>* mice 45 days post tamoxifen injection. (d) Thrombin generation was determined from the accumulation of fluorescent product over time and calculated relative to a thrombin calibrator. (e) Endogenous thrombin potential (ETP) (nM per min) and (f) peak height (nM) of plasma from *Erg<sup>iEC-KO</sup>* and *Erg<sup>fl/fl</sup>* mice. Both parameters were calculated and plotted as mean per individual mouse (n=4-5 per genotype). (g) Platelet counts (Platelets  $\times 10^3$  per  $\mu$ l expressed as % of control mice) were determined on plasma from *Erg<sup>iEC-KO</sup>* and *Erg<sup>fl/fl</sup>* mice, 45 days post tamoxifen (n=4-5 per genotype). (h) Expression of the platelet marker GP1b $\beta$  in *Erg<sup>fl/fl</sup>* and *Erg<sup>iEC-KO</sup>* mice was measured by flow cytometry (n=4-5 per genotype). All graphical data (except data presented in d) are mean  $\pm$  s.e.m., \*P<0.05, \*\*P<0.01, Student's t-test. Source data are provided as a Source Data file.

**a**

Phenotype 30 days post tamoxifen

| Liver clots | Liver hemorrhages | Liver C+H   | Lung hemorrhages | Platelet counts        | Fibrinogen           | D-dimer                | TAT                    |
|-------------|-------------------|-------------|------------------|------------------------|----------------------|------------------------|------------------------|
| 77.8% (7/9) | 66.7% (6/9)       | 55.6% (5/9) | 55.9% (5/9)      | Decreased: 37.5% (3/8) | Decreased: 50% (4/8) | Increased: 87.5% (7/8) | Increased: 62.5% (6/8) |

**b**

Phenotype 45 days post tamoxifen

| Liver clots | Liver hemorrhages | Liver C+H | Lung hemorrhages | Platelet counts      | D-dimer              | Thrombin Generation   |
|-------------|-------------------|-----------|------------------|----------------------|----------------------|-----------------------|
| 100% (4/4)  | 75% (3/4)         | 75% (3/4) | 50% (2/4)        | Decreased: 75% (3/4) | Increased: 50% (2/4) | Increased: 100% (4/4) |

**Supplementary Figure 2:** Variable penetrance of the phenotype and progression of the disease in adult ERG-deficient mice (**a**) 30 and (**b**) 45 days post tamoxifen injection. The values represent the percentage of *Erg*<sup>IEC-KO</sup> mice showing the depicted phenotype. Numbers in brackets are: the number of *Erg*<sup>IEC-KO</sup> mice with the specified phenotype and the total number of *Erg*<sup>IEC-KO</sup> mice analysed for the study. C+H: presence of clots and hemorrhages in liver

**a**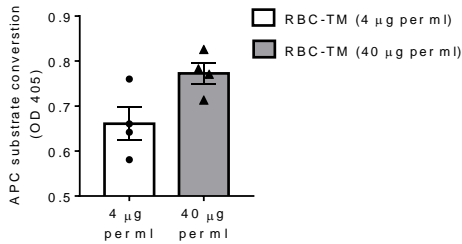**b**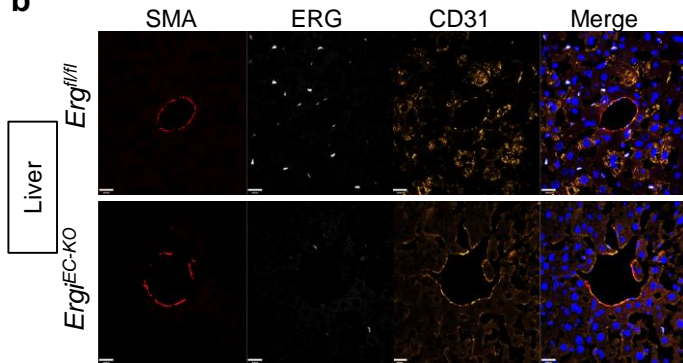**c**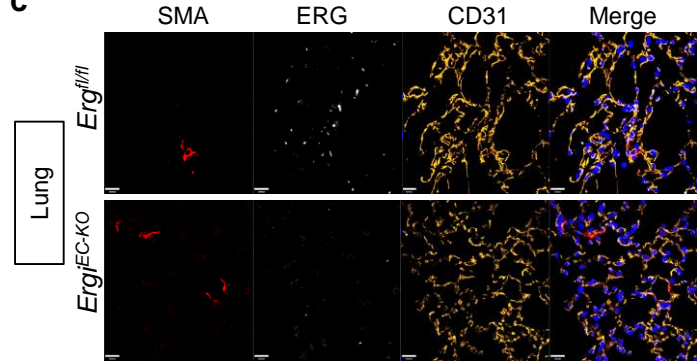**d**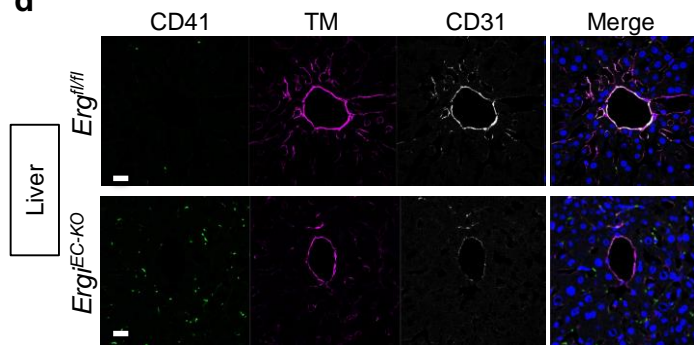**e**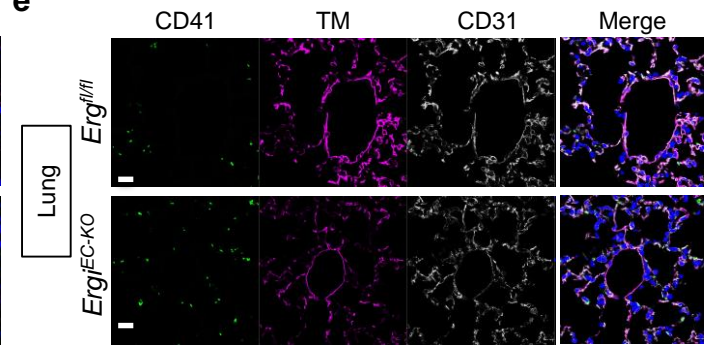

**Supplementary Figure 3: Controls for *in vivo* rescue experiment using RBC-TM. (a)** APC generation assay *in vitro*. Free RBC-TM (4 or 40 µg per ml) was incubated with 5 nM bovine thrombin and 300 nM human protein C for 20 minutes at room temperature. Thrombin was quenched with hirudin (50 U per mL), and APC was measured using Spectrozyme (OD at 405nm). Samples were run in quadruplicates. Graphical data are mean  $\pm$ s.e.m., presented as maximum signal reached at 20 min. **(b-c)** Confirmation of ERG deletion was assessed by immunofluorescence in **(b)** liver and **(c)** lung sections from adult *Erg<sup>fl/fl</sup>* and *Erg<sup>IEC-KO</sup>* mice 25 days after tamoxifen injection (6 hours after RBC-TM injection). ERG is shown in grey; sections are co-stained for CD31 (yellow) and SMA (Smooth muscle actin) (red) to visualize blood vessels and nuclei are identified by DAPI (blue). Scale bar 50 µm. **(d-e)** Confirmation of TM decreased expression was assessed by immunofluorescence in **(d)** liver and **(e)** lung sections from adult *Erg<sup>fl/fl</sup>* and *Erg<sup>IEC-KO</sup>* mice 25 days after tamoxifen injection (6 hours after RBC-TM injection). TM is shown in magenta; sections are co-stained for CD31 (grey) to visualize blood vessels and CD41 (green) to visualize platelets; nuclei are identified by DAPI (blue). Scale bar 50 µm. Source data are provided as a Source Data file.

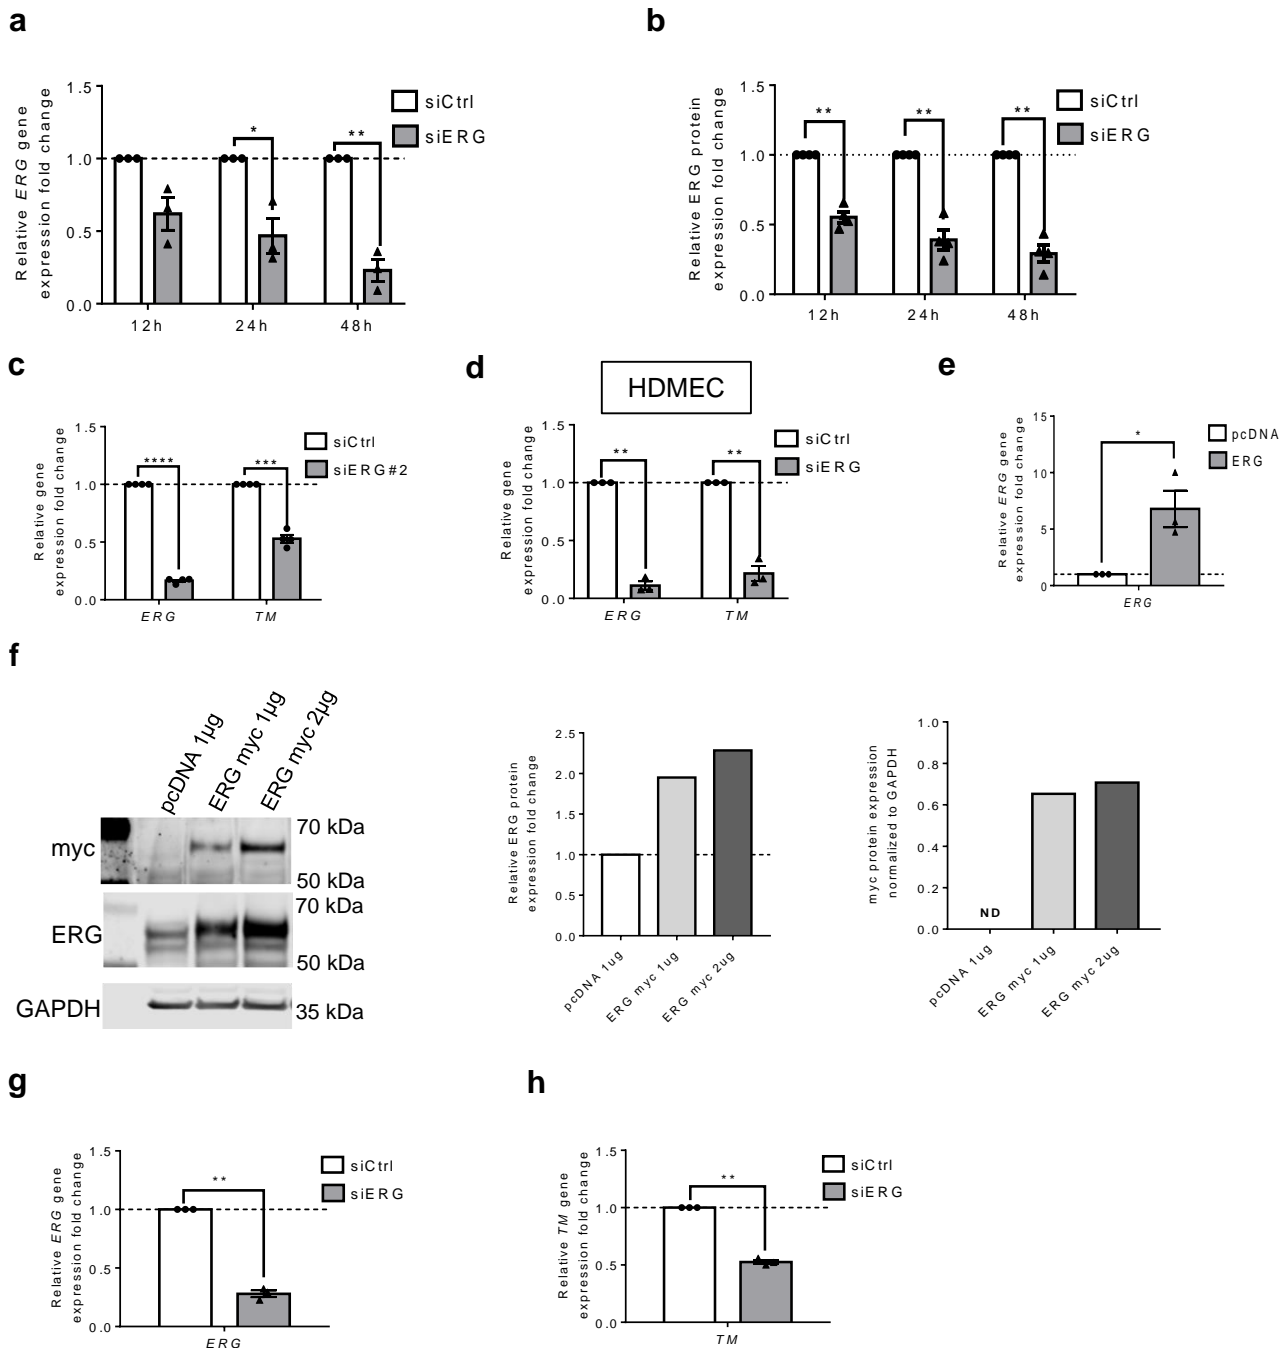

**Supplementary Figure 4: ERG controls the expression of thrombomodulin in macro- and micro-vascular endothelial cells in static conditions.** (a) qPCR (n=3 independent experiments) and (b) immunoblotting (n=4 independent experiments) analysis of ERG expression in control (siCtrl) and ERG-deficient (siERG) HUVEC (macrovascular EC) after 12, 24 and 48 hours siRNA treatment. (c) qPCR analysis of *ERG* and *TM* gene expression following transfection of HUVEC with a second siRNA targeting exon7 of ERG (siERG#2) (n=4). (d) qPCR analysis of *ERG* and *TM* expression in control (siCtrl) and ERG-deficient (siERG) HDMEC (microvascular EC) after 48 hours siRNA treatment (n=3 independent experiments). (e) *ERG* mRNA expression (n=3 independent experiment) and (f) representative immunoblotting and quantification of ERG and myc in HUVEC transfected with control pcDNA or ERG expression plasmid (myc tagged, noted ERG). (g) *ERG* and (h) *TM* mRNA levels in HUVEC treated with siCtrl or siERG for 48 hours and used for APC assays (n=3 independent experiments). All graphical data (except data presented in f) are mean  $\pm$  s.e.m., \*P < 0.05, \*\*P < 0.01, \*\*\*P < 0.001, \*\*\*\*P < 0.0001, Student's t-test. Source data are provided as a Source Data file.

**a**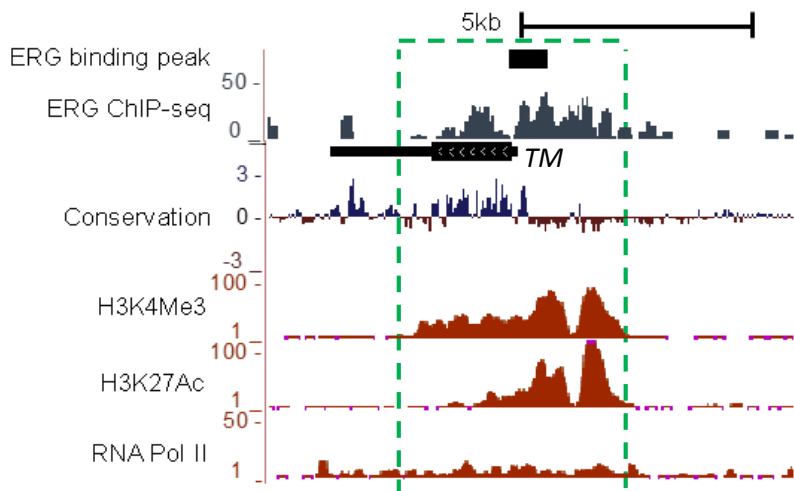**b**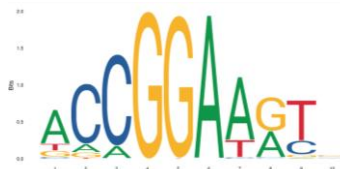**c**

### ERG peak sequence on the TM promoter(-559bp;+215bp)

```
>hg19_dna_range=chr20:23030101-23030909 5'pad=0 3'pad=0
strand=+ repeat Masking=none
```

```
CCGGCCAGGGCCAGCGCGCCAAGGACCAGGACCCCAAGCATGTTACCCAG
51 GCGCGCCCGGTGCAGGCGCCGGGAAAGCGCGGGCACTGCGACAGGGCCG
TGCCGGAGCAGAGGGGCACAGGACGCCGATGGCGACAGCCTCTCCTGTCC
151 GTCCAGCCCAGACACTTCTTGCCGCTGCGCGCAGCCCCTGCGAGGCAGC
CTCTGACATGCGGATCGGCCAGGGCTCGAGTTTATAAAGTGCCCGGCCCTC
251 CCTCCCTGGACGTTTCGGGA AAAGGAAGGAAGTGCCTGGTGGGAAGGGCTG
ATGCCGCATACTCGGATTGCTGGGTTCTCTGGCCCGCCCTTGCGCCCCCG
351 TCGCGCATGGGATCA CCTCGCCGGGATGAGTAAACCCTGCCCTGGCGCAG
GGAGTTTCTCGGGCGGGCCGACAGGGGCAGGCGCCAGGGAAGGCCAGCA
451 CCCCTGTAACAAGACGACTGTCCCCCGCCACCCTCGGGCCCCACGCGT
GCAGCCCTCTTTCATCTCTTGGTCTCTCTTTCTTTCTTTTCATACATGTT
551 ACAGCCACTTCCAAGGAAAGCCTGGATTGCAAGAGCTCTGGGAACCGGAG
ACTTCAGAGAAGAGGGCTTTGAATGGGGAGTGGGGGAGGTGGTGCACAGG
651 ACCTGCAAGACGCTGGGAGGGGTGATCGGCACCAAGGGCACTTTGGGAGG
ACCTGCCTAGGACGTGGACTTCCCCGAAGACAGGATCGCAAGGAGAGACA
751 GCTGGATCCTGTCCGCGGCCAAGGTGCCTGGCTCAGGAAACCAGCGGAGC
GCGCTTGGC
```

Keys:

Regulatory elements:

Green: TATAA box

TSS

Transcription factors binding sites:

ERG binding sites

KLF2 binding site

Sp1/KLF binding sites

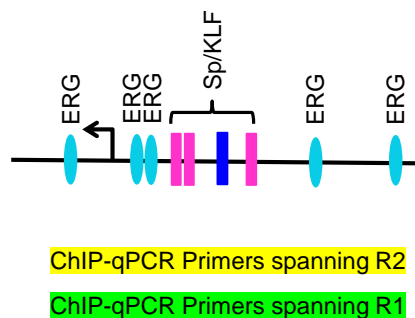

ChIP-qPCR Primers spanning R2

ChIP-qPCR Primers spanning R1

**Supplementary Figure 5:** Analysis of thrombomodulin locus. **(a)** Thrombomodulin (*TM*) whole locus. ENCODE sequence conservation between 100 vertebrates and ERG ChIP-seq data are shown across this region. ENCODE ChIP-seq data profiles for H3K4Me3, H3K27Ac and RNA Pol II indicate open chromatin and active promoter region. Dashed green box highlights promoter region presented in Figure 4a. **(b)** ERG binding motif sequence used for the analysis of the ERG binding profile on *TM* promoter was obtained from JASPAR (2018) database (matrix ID: MA0474.2). **(c)** Sequence of ERG binding peak (identified by ChIP-seq) on the *TM* promoter: -559bp;+215bp around transcription start site (TSS). Sequence was annotated for ERG (light/dark blue) putative DNA binding sites, for known KLF2 (red) and Sp1/KLFs binding sites (pink). Binding sites are also depicted in the right cartoon. TATAA box (green) and Predicted TSS (light grey) obtained from SwitchGear TSS track from ENCODE Project are indicated. Location of ChIP-qPCR primers spanning regions R1 (green) and R2 (yellow) are indicated. Arrow shows direction of transcription.

## Sequence of TM promoter luciferase construct (1.078kB)

```

>hg19_dna range=chr20:23030315-23031391 5'pad=0
3'pad=0 strand=+ repeat Masking=none
←
TCGGCCAGGGCTCGAGTTTATAAGTGCCCGGCCCTCCCTCCCTGGACGTT
51 CGGGA AAAA CGAA CGAAGT CCTGGTGGGAAGGGCTGATGCCGCATACTCG
   GATTGCTGGGTTCCTCTGGCCGCCCTTGCGCCCGCCCTCGCGCATGGGATC
151 ACCTCGCCGGGATGAGTAAACCC TGCCCTGGCGCAGGGAGGTTCTCGGGC
   GGGGCCGACAGGGGCAGGCGCCAGGGAAGGCCAGCACCCCTGTAACAAGA
251 CGACTGTCCCCGCCACCAC TCGGGCCCCACGCGTGCAGCCCTCTTTCA
   TCTCTTGGTCCCTCTTTCTTTCTTTTCATACATGTTACAGCCACTTCCAA
351 GGAAAGCCTGGATTGCAAGAGCTCTGGGA ACCGGAGACT TCAGAGAAGAG
   GGCTTTGAATGGGGAGTGGGGGAGGTGGTGCACAGGACCTGCAAGACGCT
451 GGGAGGGGTGATCGGCACCAAGGGC ACTTTGGGAGGACCTGCCTAGGACG
   TGGACTTCCCCGAAGACAGGATCGCAAGGAGAGACAGCTGGATCCTGTCC
551 GCGGCCAAGGTGCCTGGC TCAGG AAAACC AGCGGAGCGCGCTTGGCCTCAC
   AGGACAGTGGGTGTGGCTGGGGTGACGGGGCAGGGTGGGGAAGACTGGCC
651 TAACACCAGCGCCCTCTGCCCATGGCTGGCCAGGGACCCGCGAGTCCCT
   GGACACGCACTGGCCAACGCCAGACCCCATCTCATCGGGTGGGGAAGTCG
751 CGGGGACACTGTCAGGGCGCCGAAGTCCGGACCCGGCTCAGAGGCGGTGG
   CAGGTGAATTGCTGCGGCGCCGGGTAGGGGCGGGCGCGTGGGAGCGAGTC
851 AGCCTGGCCAGTTTCGGCCCAGCTTCCGAAGGATGGTGTCTTTCACCC
   CAACAGAGTGGCTGGCAACCCCCCAGGGGAGCGCGCAGGATCCCAGCTGA
951 TCCCACCCGGGTGCGCTAAGGAGGTTTCCATTTTCGTCCAGAGTCCGAATT
   GATACCCACGTGCATAGAAACGCCACTTGCTCGGCAAAGGGCACTGAAGA
1051 GCCACCGTCTGTGGATGGGCAGGGTG
  
```

### Keys:

Green: TATAA box

TSS

ERG binding sites (EBS)

### Nucleotide mutations:

Mutant 1: 2 EBS

59 G to C

60 G to C

63 G to C

64 G to C

Mutant 2: 4 EBS

mutants in 1 plus:

383 G to C

384 G to C

573 G to C

**Supplementary Figure 6:** Mutagenesis of ERG binding sites on TM promoter. Strategy for the mutagenesis of ERG binding sites (EBS) on TM promoter luciferase construct (1.078kB). DNA sequence of TM promoter construct was annotated for EBS (light blue). TATAA box (green) and Predicted TSS (light grey) are indicated. Arrow shows direction of transcription. Mutagenesis of 2 or 4 EBS was achieved by mutating 4 or 7 G nucleotides (red) into C.

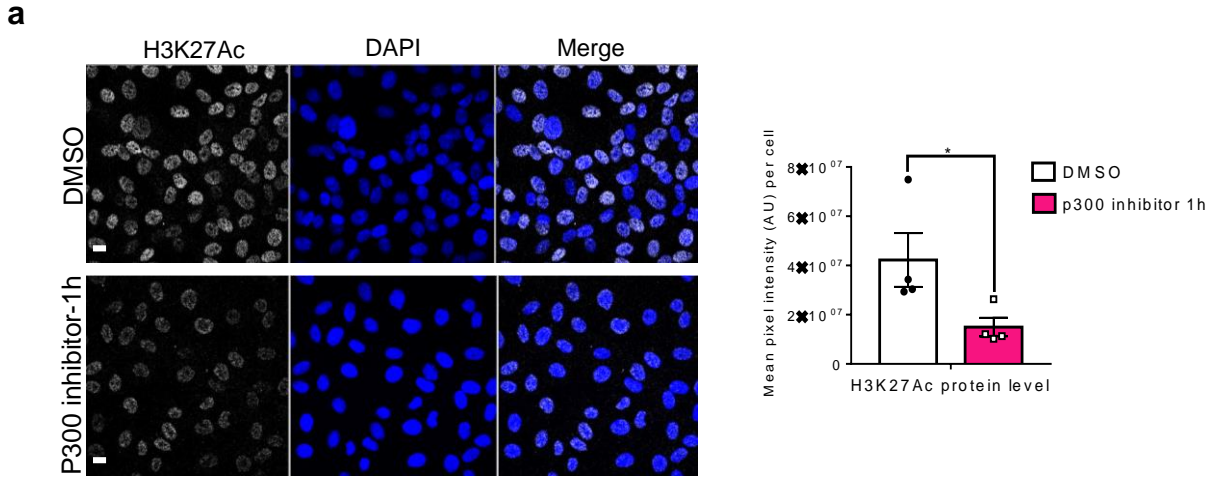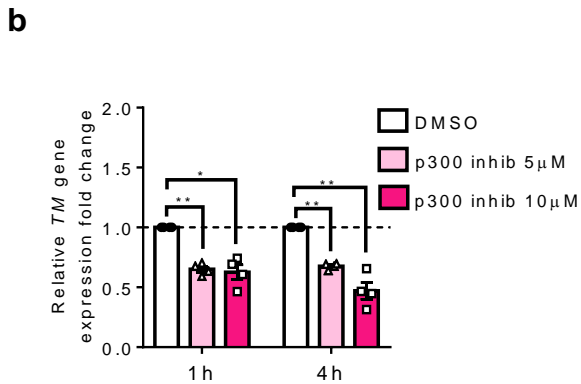

**Supplementary Figure 7:** P300 inhibition leads to a decreased in H3K27Ac protein level and *TM* mRNA levels in HUVEC (a) Representative immunofluorescence image and quantification of H3K27Ac expression (grey) in HUVEC treated with DMSO or p300 inhibitor (10 μM) for 1 hour; nuclei are identified by DAPI (blue). Scale bar 40 μm. Quantification represents the mean pixel intensity for H3K27Ac (arbitrary unit, A.U.) per cell (n=4 independent experiments). Student's t-test. (b) qPCR analysis of *TM* gene expression in HUVEC treated with DMSO, p300 inhibitor 5 μM or 10 μM for 1 hour or 4 hours (n=4 independent experiments). One-Way ANOVA test. All graphical data are mean ± s.e.m., \*P < 0.05, \*\*P < 0.01. Source data are provided as a Source Data file.



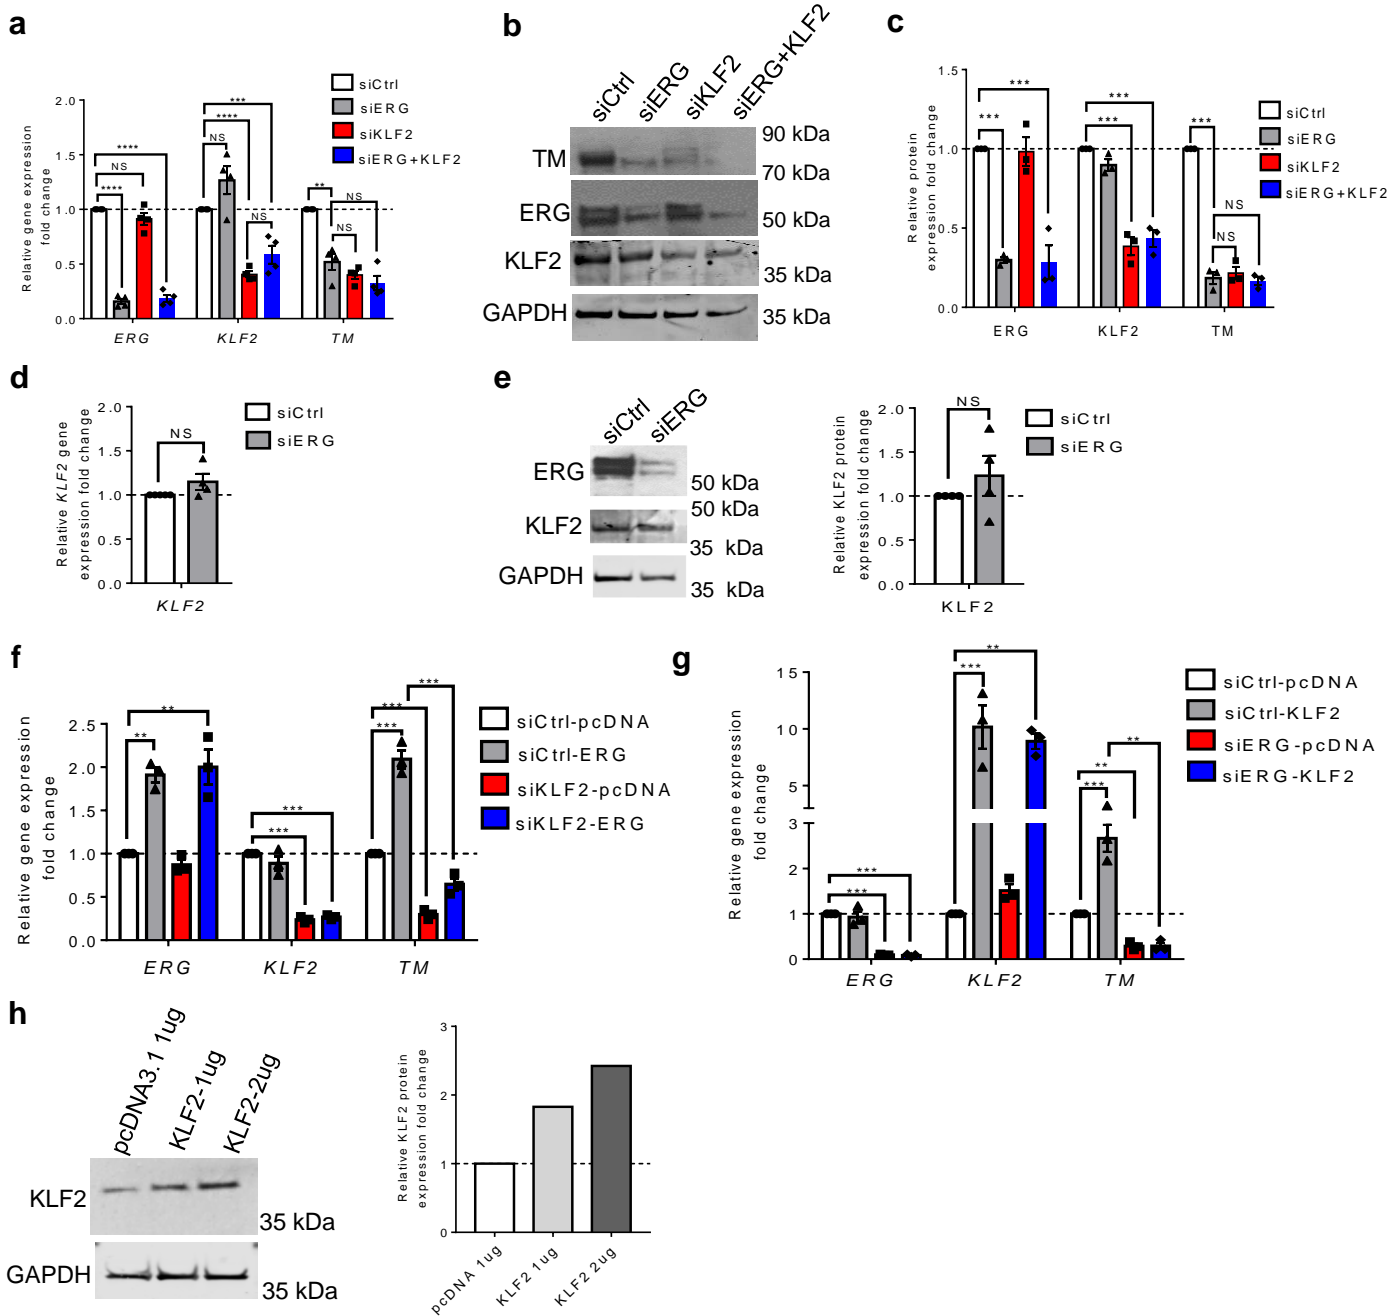

**Supplementary Figure 8: ERG cooperates with KLF2 but does not regulate its expression.** (a) qPCR analysis of *ERG*, *KLF2* and *TM* mRNA expression in siCtrl, siERG, siKLF2 and siERG+KLF2-treated HUVEC after 48 hours (n=4 independent experiments). One-Way ANOVA test. (b) Representative immunoblots and (c) quantification for ERG, KLF2 and TM protein levels in siCtrl, siERG, siKLF2 and siERG+KLF2-treated HUVEC after 48 hours (n=4 independent experiments). One-Way ANOVA test. (d) qPCR and (e) immunoblotting analysis of KLF2 levels in siCtrl and siERG-treated HUVEC after 48 hours (n=4 independent experiments). Student's t-test. (f) qPCR analysis of *ERG*, *KLF2* and *TM* gene expression following transfection of HUVEC with control or KLF2 siRNA for 48h and transfection with control pcDNA or ERG-myc plasmid (notes ERG) for 24h (n=3 independent experiments). One-Way ANOVA test. (g) qPCR analysis of *ERG*, *KLF2* and *TM* gene expression following transfection of HUVEC with control or ERG siRNA for 48h and transfection with control pcDNA or KLF2 plasmid (noted KLF2) for 24h (n=3 independent experiments). One-Way ANOVA test. (h) Representative immunoblot and quantification for KLF2 protein level following transfection of HUVEC with control pcDNA or KLF2 plasmid for 24h. All graphical data (except data presented in h) are mean  $\pm$  s.e.m., NS: Not Significant, \*\*P<0.01, \*\*\*P<0.001, \*\*\*\*P<0.0001. Source data are provided as a Source Data file.

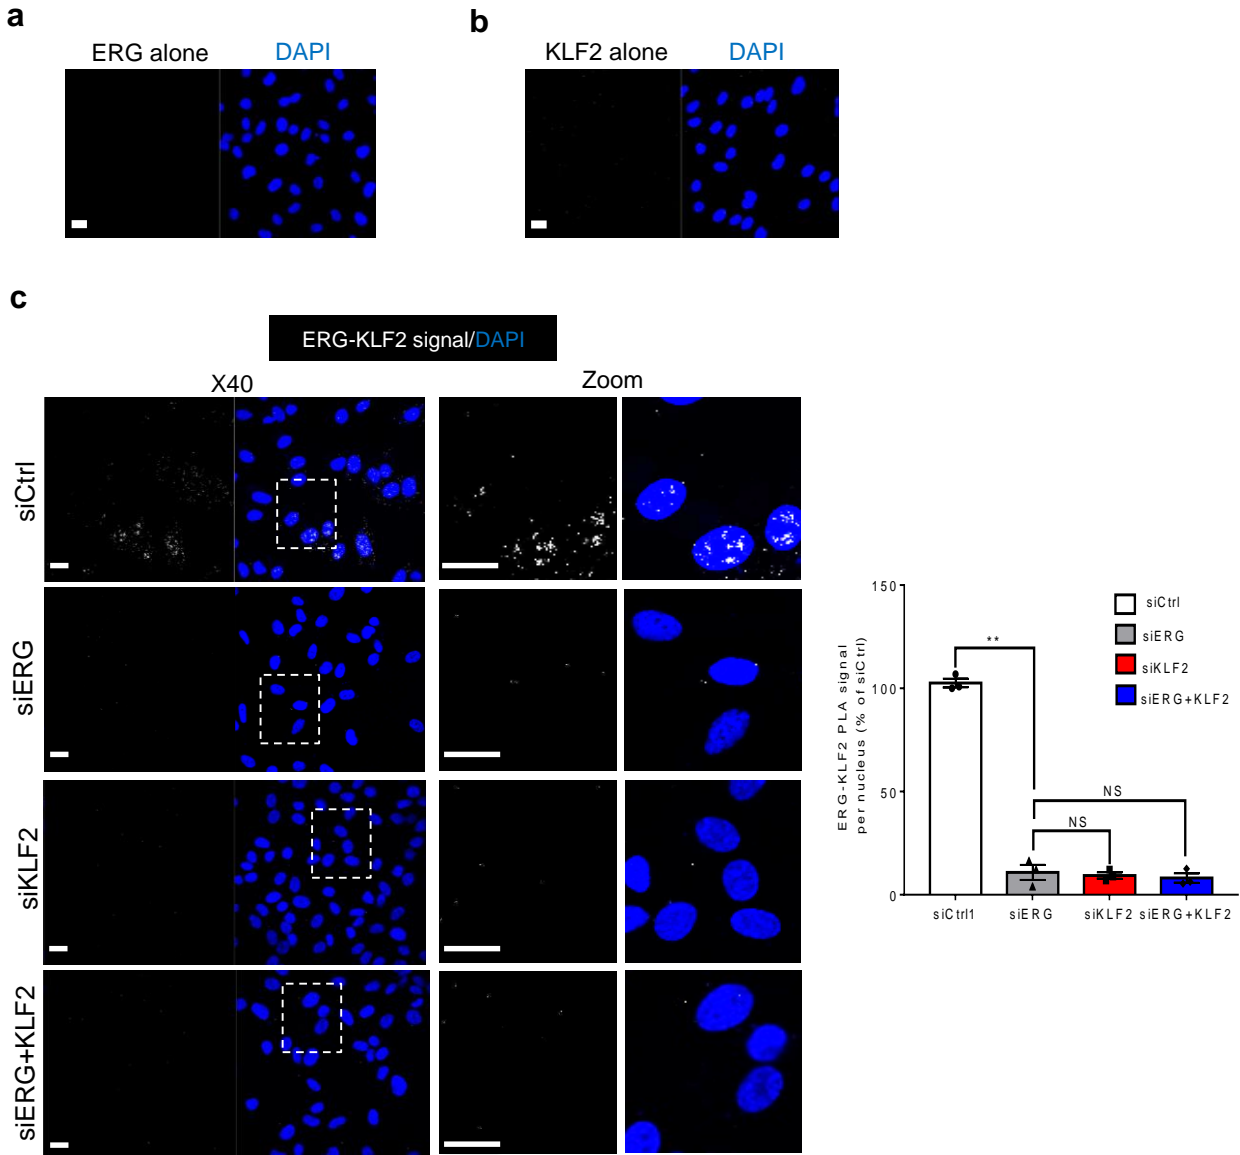

**Supplementary Figure 9:** Specificity of ERG-KLF2 PLA signal. **(a-c)** Specificity of **(a)** ERG antibody and **(b)** KLF2 antibody used for PLA assay and background signal was established by assessing each primary antibody alone; nuclei are identified by DAPI (blue). Scale bar 20  $\mu$ m. **(c)** Specificity of ERG and KLF2 PLA signal was also assessed in siCtrl, siERG, siKLF2 and siERG+KLF2-treated HUVEC after 48 hours; nuclei are identified by DAPI (blue). Scale bar 40  $\mu$ m. Quantification represents ERG-KLF2 signal per nucleus expressed as percentage of siCtrl-treated HUVEC (n=3 images per condition, n=1 experiment). Graphical data are mean  $\pm$ s.e.m., NS: Not Significant, \*\*P<0.01, One-Way ANOVA test. Source data are provided as a Source Data file.

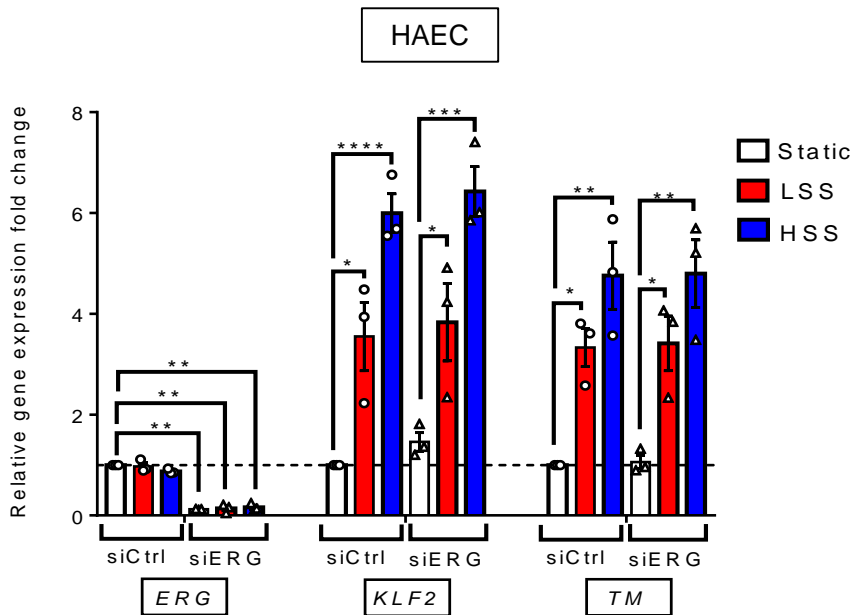

**Supplementary Figure 10:** ERG does not control the expression of thrombomodulin in human aortic endothelial cells. qPCR analysis of *ERG*, *KLF2* and *TM* mRNA expression in siCtrl or siERG-deficient HAEC under static conditions or after 24 hours under LSS or HSS (n=3 independent experiments) conditions. Graphical data are mean  $\pm$ s.e.m., \*P<0.05, \*\*P<0.01, \*\*\*P<0.001, One-Way Anova test. Source data are provided as a Source Data file.

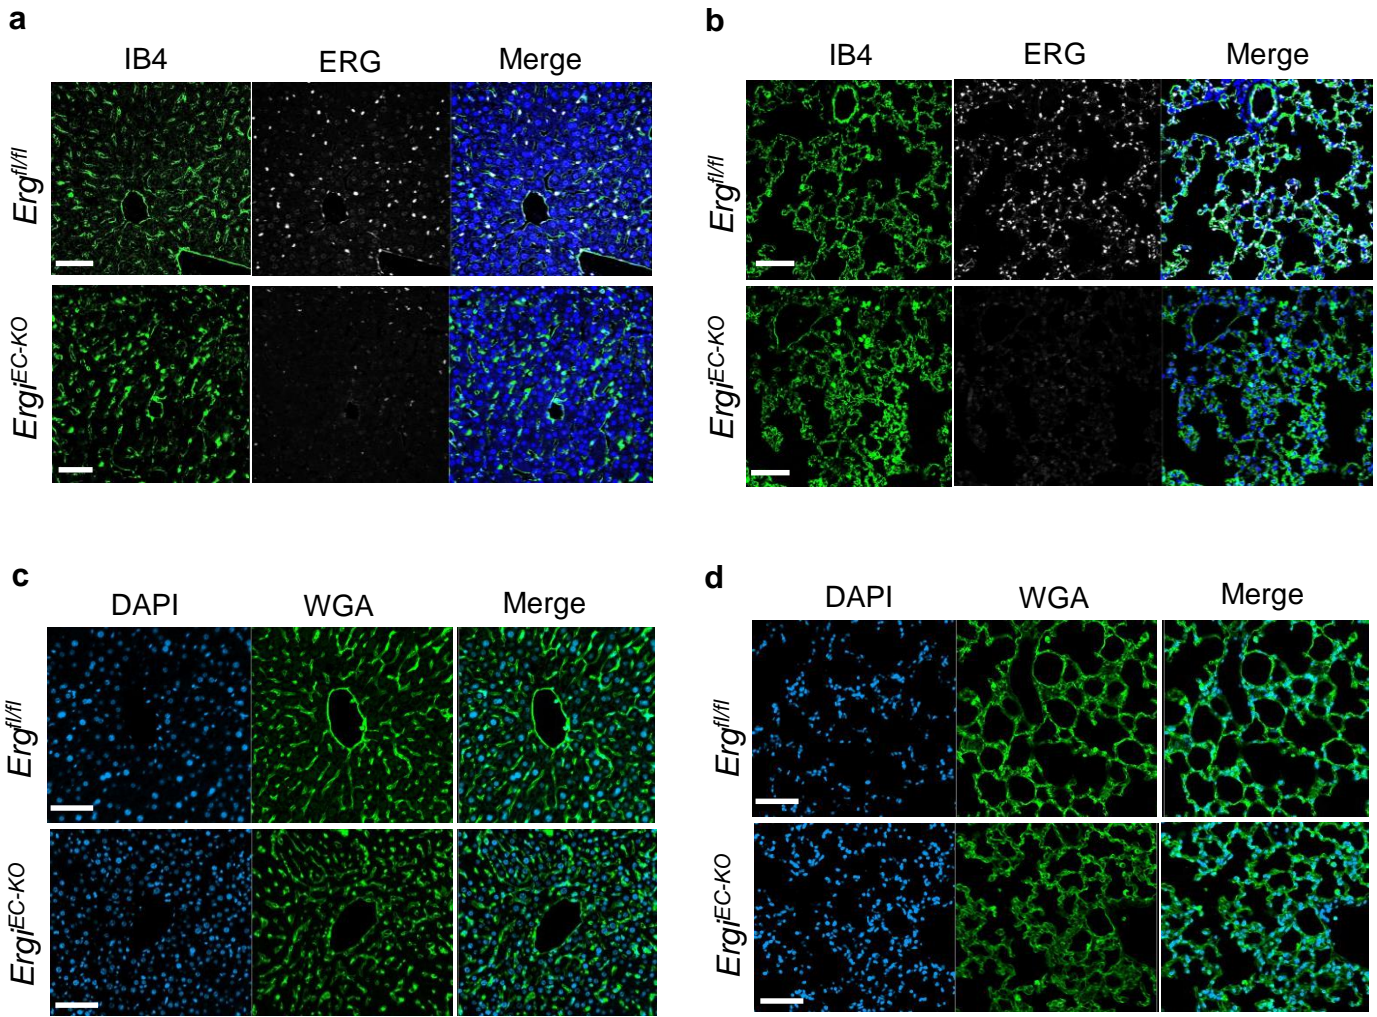

**Supplementary Figure 11:** Confirmation of ERG knockdown in endothelial cells in mouse liver and lung. **(a-b)** Confirmation of ERG deletion was assessed by immunofluorescence in **(a)** liver and **(b)** lung sections from adult control (*Erg<sup>fl/fl</sup>*) and ERG-deficient (*Erg<sup>EC-KO</sup>*) mice 30 days after tamoxifen injection. ERG is shown in grey; sections are co-stained for Isolectin B4 (IB4) (green) to visualize blood vessels and nuclei are identified by DAPI (blue). Scale bar 50  $\mu$ m. **(c-d)** Representative image of immunofluorescence of wheat germ agglutinin (WGA) expression (green) to visualize tissue architecture in **(c)** liver and **(d)** lung sections from *Erg<sup>fl/fl</sup>* and *Erg<sup>EC-KO</sup>* mice 45 days after tamoxifen injection; nuclei are identified by DAPI (blue). Scale bar 50  $\mu$ m.

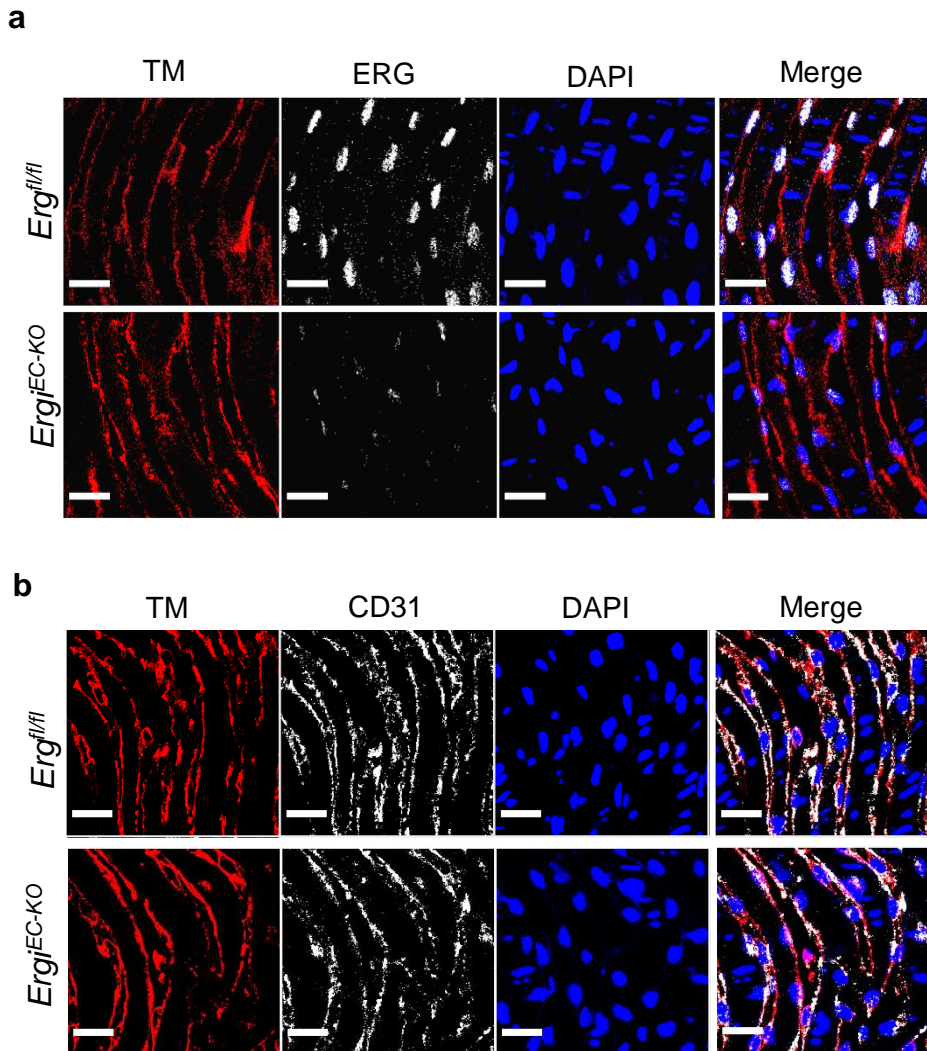

**Supplementary Figure 12:** ERG does not regulate thrombomodulin expression in aorta *in vivo*. **(a-b)** Representative image of en face staining for TM (red) on the descending aorta (laminar flow region) from adult control (*Erg<sup>fl/fl</sup>*) and ERG-deficient (*Erg<sup>iEC-KO</sup>*) mice, 30 days post tamoxifen injection. The tissues were co-stained for **(a)** ERG (grey) or **(b)** CD31 (grey) ; nuclei are identified by DAPI (blue). Scale bar 20  $\mu$ m. Source data are provided as a Source Data file.

| Target    | Company    | Sequence                        |
|-----------|------------|---------------------------------|
| ERG exon6 | Qiagen     | 5'-CAGATCCTACGCTATGGAGTA-3'     |
| ERG exon7 | Invitrogen | 5'-ACTCTCCACGGTTAATGCATGCTAG-3' |
| KLF2      | Qiagen     | 5'-CACCTGGCGCTGCACATGAAA-3'     |

**Supplementary Table 1:** Sequences of siRNA used for HUVEC transfection

| Antibody (host)                            | Company                  | Catalogue number | Application and dilution                           |
|--------------------------------------------|--------------------------|------------------|----------------------------------------------------|
| CD31 (rabbit)                              | Abcam                    | ab28364          | IF (mouse tissue, 1/200)                           |
| CD41 [MWRReg30] (rat)                      | Abcam                    | ab33661          | IF (mouse tissue, 1/200)                           |
| Isolectin B4 (IB4)                         | Vector                   | FL-1201          | IF (mouse tissue, 1/200)                           |
| Wheat Germ Agglutinin (WGA)                | Thermo Fisher Scientific | W11261           | IF (mouse tissue, 1/400)                           |
| ERG (mouse)                                | Santa Cruz               | sc-376293        | PLA (HUVEC, 1/200)/WB (HUVEC, 1/2000)              |
| ERG (rabbit)                               | Abcam                    | ab133264         | IF (HUVEC, 1/200)/WB (HUVEC, 1/1000)               |
| ERG (rabbit)                               | Abcam                    | ab92513          | IF (mouse tissue, 1/200)/WB (mouse tissue, 1/1000) |
| Fibrinogen (rabbit)                        | Abcam                    | ab34269          | IF (mouse tissue, 1/200)                           |
| GAPDH (mouse)                              | Millipore                | MAB374           | WB (HUVEC, mouse tissue, 1/10000)                  |
| H3K27Ac (rabbit)                           | Active Motif             | 39133            | IF (HUVEC, 1/200)                                  |
| KLF2 (rabbit)                              | Abcam                    | ab203591         | PLA (HUVEC, 1/100)/WB (HUVEC, 1/500)               |
| Actin, $\alpha$ -smooth muscle-Cy3 (mouse) | Sigma                    | C6198            | IF (mouse tissue, 1/400)                           |
| TM (mouse)                                 | Dako                     | Clone 1009       | IF (HUVEC, 1/100)                                  |
| TM (mouse)                                 | Santa Cruz               | sc-13164         | WB (HUVEC, 1/1000)                                 |
| TM (goat)                                  | R&D                      | AF3894           | IF (mouse tissue, 1/200)/WB (mouse tissue, 1/1000) |

**Supplementary Table 2:** List of antibodies used for this study on HUVEC and mouse tissue. IF: Immunofluorescence; WB: Western-Blot; PLA: Proximity ligation assay. Dilution of the antibodies used for each specific application is specified in brackets.

| Target       | Primers | Oligonucleotide Sequences 5' to 3' |
|--------------|---------|------------------------------------|
| <i>A2M</i>   | Forward | GCAGCATAAAGCCCAGTTGC               |
|              | Reverse | ATACTGCGGTTTTCCAGAGACT             |
| <i>eNOS</i>  | Forward | GTGATGGCGAAGCGAGTGAAGG             |
|              | Reverse | ACCACCAGCACCAGCGTCTC               |
| <i>EPCR</i>  | Forward | GTCCGGAGCCTCAACTTCAGG              |
|              | Reverse | GTGGAACTGGAGCAGGTAGGAC             |
| <i>ERG</i>   | Forward | GGAGTGGGCGGTGAAAGA                 |
|              | Reverse | AAGGATGTCGGCGTTGTAGC               |
| <i>FVIII</i> | Forward | GAAAGTCACAGGAGTAACT                |
|              | Reverse | TCCCTGAAAAACCTTTACT                |
| <i>GAPDH</i> | Forward | CAAGGTCATCCATGACAACCTTTG           |
|              | Reverse | GGCCATCCACAGTCTTCTG                |
| <i>KLF2</i>  | Forward | TTGCAGTGGTAGGGCTTCTC               |
|              | Reverse | ACTCACACCTGCAGCTACGC               |
| <i>PAI1</i>  | Forward | GCAACGTGGTTTTCTCACCC               |
|              | Reverse | GGCCATGCCCTTGTCACTAA               |
| <i>PLAT</i>  | Forward | AGAAGCAACCGGGTGAATA                |
|              | Reverse | GGCTCGCTGCAACTTTTGAC               |
| <i>PLAUR</i> | Forward | GAAGGGAAGTTTGTGGCGGA               |
|              | Reverse | CAAGAGGCTGGGACGCA                  |
| <i>PTGIS</i> | Forward | CTGTGCTTGATAGCGTGCTG               |
|              | Reverse | GTCGCAGGTTGAATTCTCGC               |
| <i>PTGS2</i> | Forward | GGCCATGGGGTGGACTTTAA               |
|              | Reverse | ACCGTAGATGCTCAGGGACT               |
| <i>TF</i>    | Forward | AGTTCAGGAAAGAAAACAGCCA             |
|              | Reverse | CGGTAACTGTTCCGGGAGGG               |
| <i>TM</i>    | Forward | ACGACTGCTTCGCGCTCTACCC             |
|              | Reverse | CACCGAGGAGCGCACTGTCATTA            |
| <i>THBS1</i> | Forward | CAGGAGCAACCTCTACTCCG               |
|              | Reverse | CAGCAGGGATCCTGTGTGTA               |

**Supplementary Table 3:** List of human oligonucleotides used for qPCR

| Target       | Primers | Oligonucleotide Sequences 5' to 3' |
|--------------|---------|------------------------------------|
| <i>18S</i>   | Forward | GGACAGGATTGACAGATTGATAG            |
|              | Reverse | CTCGTTCGTTATCGGAATTAA              |
| <i>eNOS</i>  | Forward | CATCTTCAGCCCCAAACGGA               |
|              | Reverse | AGCGGATTGTAGCCTGGAAC               |
| <i>ERG</i>   | Forward | CCGATACTGTGGGGATGA                 |
|              | Reverse | TCTGCGCTCATTTGTGGTCA               |
| <i>FVIII</i> | Forward | CTTCACCTCCAGGGAAGGACTA             |
|              | Reverse | TCCACTTGCAACCATTGTTTTG             |
| <i>PAI1</i>  | Forward | AGGATCGAGGTAAACGAGAGC              |
|              | Reverse | GCGGGCTGAGATGACAAA                 |
| <i>TF</i>    | Forward | AGGATGTGACCTGGGCCTAT               |
|              | Reverse | GGCTGTCCAAGGTTTGTGTC               |
| <i>TFPI</i>  | Forward | CTGGACTCTGCCGAGGTTAC               |
|              | Reverse | AGGGGAGTGGACTGGATTCT               |
| <i>TM</i>    | Forward | GAAACTCCCTGGCTCCTATGA              |
|              | Reverse | GTCTTTGCTAATCTGACCAGCAA            |
| <i>VWF</i>   | Forward | CCGTCTTCAGTAGCTGGCAT               |
|              | Reverse | GTGTAAACGGGCATCTCCTC               |

**Supplementary Table 4:** List of mouse oligonucleotides used for qPCR



| Target                | Primers | Oligonucleotide Sequences 5' to 3'            | Application                                                           |
|-----------------------|---------|-----------------------------------------------|-----------------------------------------------------------------------|
| TM WT Promoter        | Forward | ACGTGCTAGCATCCACAGGACGGTGGCTC                 | PCR amplification of TM Wild Type promoter for reporter construct     |
|                       | Reverse | ACGTAAGCTTGCTCGAGTTTATAAGTGCCCG               |                                                                       |
| TM mutant 1 Promoter  | Forward | CCTCCCTGGACGTTCTGGGAAAACCAACCAAG<br>TGCCTGGTG | Mutagenic primers used for mutation of 2 EBS on TM Wild Type promoter |
|                       | Reverse | CACCAGGCACTTGGTTGGTTTTCCCGAACGT<br>CCAGGGAGG  |                                                                       |
| TM mutant 2a Promoter | Forward | CAAGAGCTCTGGGAACCCAGACTTCAGAGA<br>AGAGG       | Mutagenic primers used for mutation of 1 EBS on TM Wild Type promoter |
|                       | Reverse | CCTCTTCTCTGAAGTCTGGGGTTCCAGAGCT<br>CTTG       |                                                                       |
| TM mutant 2b Promoter | Forward | GCTCCGCTGGTTTGCTGAGCCAGGCAC                   | Mutagenic primers used for mutation of 1 EBS on TM Wild Type promoter |
|                       | Reverse | GTGCCTGGCTCAGCAAACCAGCGGAGC                   |                                                                       |
| TM PromR1             | Forward | CCTCGCCGGGATGAGTAAAC                          | ChIP-qPCR                                                             |
|                       | Reverse | CGGGGACAGTCGTCTTGTTA                          |                                                                       |
| TM PromR2             | Forward | ACCCAAGCATGTTACCCAG                           | ChIP-qPCR                                                             |
|                       | Reverse | GATCCGCATGTCAGAGGCTG                          |                                                                       |
| TM neg con            | Forward | GTGCGCCTTTTCAGAGTGTG                          | ChIP-qPCR                                                             |
|                       | Reverse | ACTCTGGCAGGGGAGAAAGA                          |                                                                       |

**Supplementary Table 5:** List of human oligonucleotides used for thrombomodulin promoter amplification, mutagenesis and ChIP-qPCR. EBS: ERG binding sites.
